# Supplementary material
Source: publisher figshare collection journal article supplement (https://sage.figshare.com/ndownloader/files/15123065)
Supplement: Supplementary file 1 [file 15123065]

**Supplemental Table S1. Characteristics and cognitive performance of the participating patients with type 2 diabetes**

|                                         |                               |
|-----------------------------------------|-------------------------------|
| <b>Number of patients</b>               | <b>37</b>                     |
| <b>Demographics</b>                     |                               |
| Age (years)                             | 66.7±8.7                      |
| Gender, men (%)                         | 34 (92)                       |
| Formal education (years)                | 11.4±4.4                      |
| <b>Diabetes characteristics</b>         |                               |
| Duration of type 2 diabetes (years)     | 8.3 (3.4 – 11.1)              |
| HbA1c (%) (mmol/mol)                    | 6.9 (6.6 – 7.3) (52 (49 - 56) |
| Fasting plasma glucose (mmol/L) (mg/dL) | 7.4±1.1 (133.9±20.4)          |
| <b>Medication</b>                       |                               |
| SU or glinide                           | 15 (41)                       |
| Statins                                 | 25 (68)                       |
| Antihypertensive therapy                | 29 (78)                       |
| Anti-inflammatory drugs*                | 26 (70)                       |

|                                     |                                       |
|-------------------------------------|---------------------------------------|
| <b>Cardiovascular risk factors</b>  |                                       |
| Systolic blood pressure (mmHg)      | 135±16                                |
| Diastolic blood pressure (mmHg)     | 79±7                                  |
| Total cholesterol (mmol/L) (mg/dL)  | 4.3±0.9 (167.0±35.5)                  |
| LDL-cholesterol (mmol/L) (mg/dL)    | 2.3±0.8 (90.5±31.7)                   |
| HDL-cholesterol (mmol/L) (mg/dL)    | 1.2±0.3 (46.5±11.2)                   |
| Triglycerides (mmol/L) (mg/dL)      | 1.4 (1.0 – 2.1) (120.9 (91.0 – 183.1) |
| BMI (kg/m <sup>2</sup> )            | 30.2±3.6                              |
| Waist circumference (cm)            | 109±10                                |
| Smoking:                            |                                       |
| Never smoked                        | 8 (22)                                |
| Ex-smoker                           | 24 (65)                               |
| Current smoker                      | 5 (13)                                |
| Urine-albumine-to-creatinine ratio: |                                       |
| < 30 mg/g (normal)                  | 29 (78)                               |
| 30-300 mg/g (elevated)              | 5 (14)                                |
| >= 300 mg/g (high)                  | 3 (8)                                 |

|                                                                        |                  |
|------------------------------------------------------------------------|------------------|
| <b>Macrovascular disease</b>                                           |                  |
| Myocardial infarction, coronary artery disease or previous PCI or CABG | 10 (27)          |
| Cerebrovascular disease                                                | 8 (22)           |
| Peripheral arterial occlusive disease                                  | 3 (8)            |
| <b>Cognitive performance</b>                                           |                  |
| MMSE                                                                   | 29 (27 – 30)     |
| RTI median five choice reaction time (ms)                              | 346 (313 – 397)  |
| AST median reaction latency (ms)                                       | 840 (772 – 1037) |
| PAL total errors adjusted (errors)                                     | 20 (11 – 33)     |
| SWM between errors (4-8 boxes) (errors)                                | 19±10            |
| RVP A' (range 0.00 – 1.00)                                             | 0.88±0.05        |

Data are presented as mean±standard deviation or n (%) or median (interquartile range)

CV, cardiovascular risk; SU, sulfonylurea; BMI, body mass index; PCI, percutaneous coronary intervention; CABG, coronary artery bypass graft; CES-D, Center for Epidemiological Studies Depression Scale; MMSE, mini-mental state examination; RTI, reaction time; AST, attention-switching task; PAL, paired associates learning; SWM, spatial working memory; RVP, rapid visual information processing

\* Use of non-steroidal anti-inflammatory drugs or immuno-modulating drugs (i.e. corticosteroids)

**Supplemental Table S2. Association between biomarkers of oxidation and endothelial function and cognition, additional adjustments for other covariates**

|                                                                                                     | Standardized (β) and unstandardized (B) regression coefficients (95% confidence interval of B) | p-value     | Standardized (β) and unstandardized (B) regression coefficients (95% confidence interval of B) | p-value      | Standardized (β) and unstandardized (B) regression coefficients (95% confidence interval of B) | p-value      |
|-----------------------------------------------------------------------------------------------------|------------------------------------------------------------------------------------------------|-------------|------------------------------------------------------------------------------------------------|--------------|------------------------------------------------------------------------------------------------|--------------|
| <b>Analyses adjusted for age, gender and years of formal education (basic model as in table 1)*</b> |                                                                                                |             |                                                                                                |              |                                                                                                |              |
|                                                                                                     | <i>Psychomotor speed</i> <sup>†‡</sup>                                                         |             | <i>Mental flexibility</i> <sup>†‡</sup>                                                        |              | <i>Attention</i>                                                                               |              |
| <b>Oxidation</b>                                                                                    |                                                                                                |             |                                                                                                |              |                                                                                                |              |
| <i>8-iso PGF<sub>2α</sub></i> <sup>†</sup>                                                          |                                                                                                |             | <i>β</i> -0.47                                                                                 | <b>0.005</b> | <i>β</i> -0.34                                                                                 | <b>0.03</b>  |
|                                                                                                     |                                                                                                |             | <i>B</i> -4.52                                                                                 |              | <i>B</i> -3.31                                                                                 |              |
|                                                                                                     |                                                                                                |             | (-7.60 to -1.45)                                                                               |              | (-6.36 to -0.26)                                                                               |              |
| <b>Endothelial function</b>                                                                         |                                                                                                |             |                                                                                                |              |                                                                                                |              |
| <i>ADMA</i>                                                                                         | <i>β</i> -0.39                                                                                 | <b>0.02</b> |                                                                                                |              | <i>β</i> -0.34                                                                                 | <b>0.046</b> |
|                                                                                                     | <i>B</i> -8.01                                                                                 |             |                                                                                                |              | <i>B</i> -7.08                                                                                 |              |

|                                                      |                        |       |                         |       |                   |
|------------------------------------------------------|------------------------|-------|-------------------------|-------|-------------------|
| (-14.67 to -1.35)                                    |                        |       | (-14.03 to -0.13)       |       |                   |
| Adjusted for basic model plus HbA1c                  |                        |       |                         |       |                   |
|                                                      | Psychomotor<br>speed†‡ |       | Mental<br>flexibility†‡ |       | Attention         |
| Oxidation                                            |                        |       |                         |       |                   |
| 8-iso PGF <sub>2α</sub> †                            |                        |       | β -0.48                 | 0.003 | β -0.34           |
|                                                      |                        |       | B -4.70                 |       | B -3.32           |
|                                                      |                        |       | (-7.73 to -1.68)        |       | (-6.43 to -0.20)  |
| Endothelial<br>function                              |                        |       |                         |       |                   |
| ADMA                                                 | β -0.40                | 0.018 |                         |       | β -0.34           |
|                                                      | B -8.22                |       |                         |       | B -7.08           |
|                                                      | (-14.92 to -1.52)      |       |                         |       | (-14.17 to 0.006) |
| Adjusted for basic model plus vascular risk factors§ |                        |       |                         |       |                   |
|                                                      | Psychomotor<br>speed†‡ |       | Mental<br>flexibility†‡ |       | Attention         |
| Oxidation                                            |                        |       |                         |       |                   |

|                                                              |                            |              |                             |              |                  |              |
|--------------------------------------------------------------|----------------------------|--------------|-----------------------------|--------------|------------------|--------------|
| 8-iso PGF <sub>2α</sub> †                                    |                            |              | β -0.44                     | <b>0.010</b> | β -0.38          | <b>0.025</b> |
|                                                              |                            |              | B -4.32                     |              | B -3.68          |              |
|                                                              |                            |              | (-7.53 to -1.10)            |              | (-6.86 to -0.50) |              |
| <b>Endothelial function</b>                                  |                            |              |                             |              |                  |              |
| ADMA                                                         | β -0.43                    | <b>0.012</b> |                             |              | β -0.35          | 0.052        |
|                                                              | B -8.77                    |              |                             |              | B -7.12          |              |
|                                                              | (-15.48 to -2.06)          |              |                             |              | (-14.29 to 0.06) |              |
| <b>Adjusted for basic model plus macrovascular disease  </b> |                            |              |                             |              |                  |              |
|                                                              | <b>Psychomotor speed†‡</b> |              | <b>Mental flexibility†‡</b> |              | <b>Attention</b> |              |
| <b>Oxidation</b>                                             |                            |              |                             |              |                  |              |
| 8-iso PGF <sub>2α</sub> †                                    |                            |              | β -0.46                     | <b>0.007</b> | β -0.35          | <b>0.037</b> |
|                                                              |                            |              | B -4.43                     |              | B -3.33          |              |
|                                                              |                            |              | (-7.54 to -1.32)            |              | (-6.45 to -0.22) |              |
| <b>Endothelial function</b>                                  |                            |              |                             |              |                  |              |
| ADMA                                                         | β -0.39                    | <b>0.022</b> |                             |              | β -0.34          | 0.05         |

|                                                                      |                                         |                                        |                                 |                                        |              |
|----------------------------------------------------------------------|-----------------------------------------|----------------------------------------|---------------------------------|----------------------------------------|--------------|
|                                                                      | B -8.01<br>(-14.78 to -1.24)            |                                        |                                 | B -7.08<br>(-14.16 to -0.006)          |              |
| <b>Adjusted for basic model plus use of anti-inflammatory drugs{</b> |                                         |                                        |                                 |                                        |              |
|                                                                      | <b>Psychomotor<br/>speed†‡</b>          |                                        | <b>Mental<br/>flexibility†‡</b> | <b>Attention</b>                       |              |
| <b>Oxidation</b>                                                     |                                         |                                        |                                 |                                        |              |
| 8-iso PGF <sub>2α</sub> †                                            |                                         | β -0.52<br>B -5.01<br>(-8.00 to -2.02) | <b>0.002</b>                    | β -0.34<br>B -3.30<br>(-6.46 to -0.14) | <b>0.041</b> |
| <b>Endothelial<br/>function</b>                                      |                                         |                                        |                                 |                                        |              |
| ADMA                                                                 | β -0.43<br>B -8.93<br>(-15.98 to -1.88) | <b>0.015</b>                           |                                 | β -0.36<br>B -7.44<br>(-14.96 to 0.07) | 0.052        |
| <b>Adjusted for basic model plus 8-iso PGF<sub>2α</sub></b>          |                                         |                                        |                                 |                                        |              |
|                                                                      | <b>Psychomotor<br/>speed†‡</b>          |                                        | <b>Mental<br/>flexibility†‡</b> | <b>Attention</b>                       |              |



| Endothelial function               |                     |                      |                  |                 |       |
|------------------------------------|---------------------|----------------------|------------------|-----------------|-------|
| ADMA                               | $\beta$ -0.35       | 0.033                | $\beta$ -0.30    | 0.07            |       |
|                                    | B -7.29             |                      | B -6.12          |                 |       |
|                                    | (-13.96 to -0.62)   |                      | (-12.84 to 0.60) |                 |       |
| Adjusted for basic model plus ADMA |                     |                      |                  |                 |       |
|                                    | Psychomotor speed†‡ | Mental flexibility†‡ | Attention        |                 |       |
| Oxidation                          |                     |                      |                  |                 |       |
| 8-iso PGF <sub>2α</sub> †          |                     | $\beta$ -0.45        | 0.008            | $\beta$ -0.30   | 0.055 |
|                                    |                     | B -4.41              |                  | B -2.91         |       |
|                                    |                     | (-7.57 to -1.25)     |                  | (-5.89 to 0.06) |       |

8-iso PGF<sub>2 $\alpha$</sub> , 8-iso prostaglandin F<sub>2 $\alpha$</sub> ; ADMA, asymmetric dimethyl arginine

\*  $\beta$ , B and p-values are based on models adjusted for age, gender and years of formal education

<sup>†</sup> Variable was log-transformed prior to regression analyses because of non-normal distribution.

‡ Z-scores were negated (i.e. multiplied by -1), so that in all analyses higher values for cognitive scores reflect better performance

§ Vascular risk factor count, with one point for each risk factor, according to the modified NCEP-ATPIII criteria: adiposity (defined as waist circumference >102 cm (male), >88 cm (female), hypertension (defined as use of anti-hypertensive treatment or arterial pressure  $\geq 130/85$  mmHg), triglycerides > 1.70  $\mu\text{mol/L}$ , and HDL cholesterol < 1.03  $\mu\text{mol/L}$  (male), < 1.29  $\mu\text{mol/L}$  (female) (9). Smoking ever (one point) was also included.

|| Presence of macrovascular disease defined as myocardial infarction, coronary artery disease or previous percutaneous coronary intervention, cerebrovascular disease or peripheral arterial occlusive disease

{ Use of non-steroidal anti-inflammatory drugs or immuno-modulating drugs (i.e. corticosteroids)
